# Supplementary material
Source: PubMed Central journal article supplement (PMC5035167)
Supplement: NIHMS772179-supplement-supplement_1.pdf [file NIHMS772179-supplement-supplement_1.pdf]

hours before insulin (4.4 mU/2  $\mu$ l) or saline injection. Values represent the mean  $\pm$  SEM for 9-10 animals per group.

**Fig. 4.** Changes in hypothalamic mRNA levels for POMC (A), NT (B), NPY (C) and AgRP (D) following DMSO + insulin or cilostamide + insulin. Mice fasted for 24 hours were injected with cilostamide (10  $\mu$ g/ $\mu$ l) or DMSO (control), followed 40 min later, with icv insulin (4.4 mU/2  $\mu$ l) or saline. Two hours later the medial basal hypothalamus was harvested to measure *Pomc*, *NTs*, *Npy* and *Agrp* mRNA levels by qPCR. Values represent the mean  $\pm$  SEM for 5 animals per group.

### Supplementary Figures

**Supplementary Fig. S1.** Effects of peripheral injection of insulin or leptin on phosphorylation of Akt at Ser<sup>473</sup> (A, B) and phosphorylation of STAT3 at Tyr<sup>705</sup> (C, D) in the hypothalamus. A, Representative p-Akt and Akt Western blots obtained from the hypothalamic extract. B, Densitometric analysis of the immunoreactive bands for p-Akt. C, Representative p-STAT3 and STAT3 Western blots obtained from the hypothalamic extract. D, Densitometric analysis of the immunoreactive bands for p-STAT3. The values for p-Akt and p-STAT3 were first calculated as ratio of Akt and p-STAT3, respectively, and then expressed as relative to saline (control) group. Values represent the mean  $\pm$  SEM for 6-8 animals per group. \*  $p < 0.05$ , \*\*  $p < 0.01$  vs saline control group. Sal

= saline, Ins = insulin, Lept = leptin.

**Supplementary Fig. S2.** Changes in insulin- or leptin-induced p-Akt<sup>ser473</sup>- and p-STAT3<sup>tyr705</sup>-positive cells in the hypothalamus following peripheral injection of insulin or leptin at 30 min post-injection. Upper Panel: Representative micrographs of p-Akt<sup>ser473</sup> ICC of hypothalamic sections from saline, insulin or leptin-treated mice. Lower Panel: Representative micrographs of p-STAT3<sup>tyr705</sup> ICC of hypothalamic sections from saline, insulin or leptin-treated mice. Mice were fasted overnight and injected with insulin (15 IU/kg, ip), leptin (3.5 mg/kg, ip) or saline and killed 30 min later. Images are representative sections at approximately bregma -1.82 to -1.9 in relation to the mouse brain atlas by Paxinos and Franklin [86]. Scale bars = 100µm. ME, Median eminence; ARC, arcuate nucleus; VMN, ventromedial nucleus; DMN, dorsomedial nucleus, 3v, third ventricle.

**Supplementary Fig. S3.** Effects of central injection of insulin or leptin on phosphorylation of Akt at Ser<sup>473</sup> (A, B) and phosphorylation of STAT3 at Tyr<sup>705</sup> (C, D) in the hypothalamus. A, Representative p-Akt and Akt Western blots obtained from the hypothalamic extract. B, Densitometric analysis of the immunoreactive bands for p-Akt. C, Representative p-STAT3 and STAT3 Western blots obtained from the hypothalamic extract. D, Densitometric analysis of the immunoreactive bands for p-STAT3. The values for p-Akt and p-STAT3 were first calculated as ratio of Akt and p-STAT3, respectively, and then

expressed as relative to saline (control) group. Values represent the mean  $\pm$  SEM for 6-8 animals per group. \*  $p < 0.05$ , \*\*  $p < 0.01$  vs saline control group.

**Supplementary Fig. S4.** Changes in insulin- or leptin-induced p-Akt<sup>ser473</sup>- and p-STAT3<sup>tyr705</sup>-positive cells in the hypothalamus following central injection of insulin or leptin at 30 min post-injection. Upper Panel: Representative micrographs of p-Akt<sup>ser473</sup> ICC of hypothalamic sections from saline, insulin or leptin-treated mice. Lower Panel: Representative micrographs of p-STAT3<sup>tyr705</sup> ICC of hypothalamic sections from saline, insulin or leptin-treated mice. Mice were fasted overnight and injected with insulin (4.4 mU), leptin (4  $\mu$ g/2 $\mu$ l, ip) or saline (2 $\mu$ l) and killed 30 min later. Images are representative sections at approximately bregma -1.82 to -2.00 in relation to the mouse brain atlas by Paxinos and Franklin [84]. Scale bars = 100 $\mu$ m. ME, Median eminence; ARC, arcuate nucleus; VMN, ventromedial nucleus; DMN, dorsomedial nucleus, 3v, third ventricle.

**Supplementary Fig. S5.** Changes in the number of p-Akt<sup>ser473</sup>-positive cells in the arcuate (ARC), ventromedial nucleus (VMN) and dorsomedial nucleus (DMN) in the hypothalamus of mice following intra-peritoneal (ip) or intracerebroventricular (icv) injection of leptin, insulin or saline (control). One of five series from each animal was analyzed. All p-Akt<sup>ser473</sup>-positive cells were counted in three or four evenly-matched sections through the ARC regions (Bregma approximately -1.7 to -2.06) of individual animals and expressed as the number per section. Values represent the mean  $\pm$  SEM for 3 animals per group. Note that the vertical scales

in panels A and B are different. \*  $p < 0.05$ , \*\*  $p < 0.01$  vs saline control group; a  $p < 0.01$  vs leptin group.

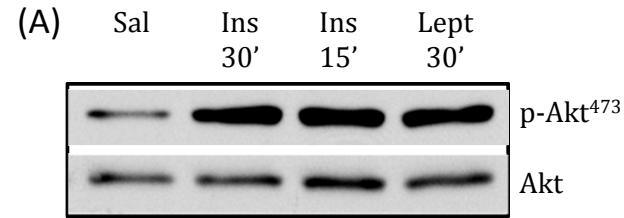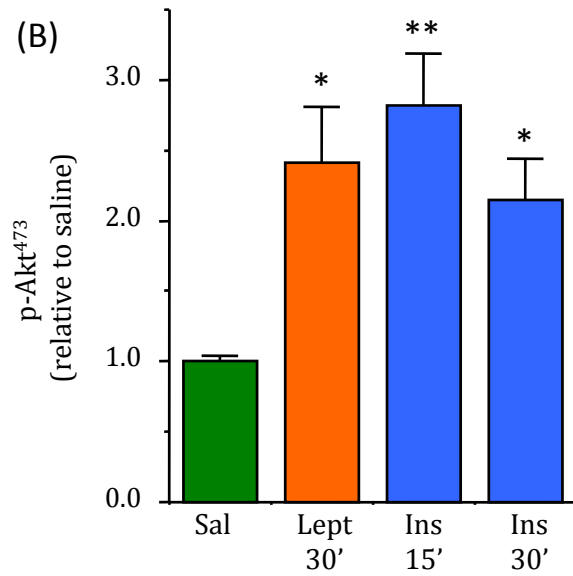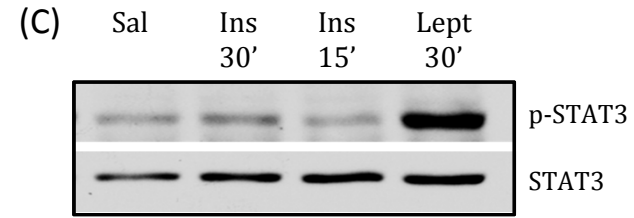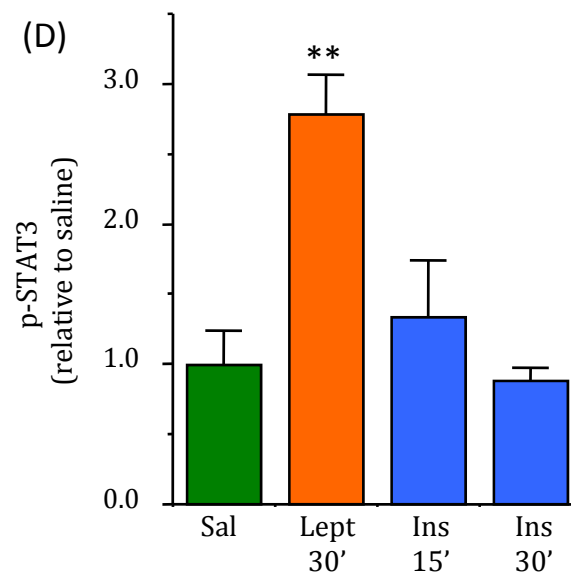

Supplementary Figure 1  
M. Sahu et al

Effect of peripheral insulin or leptin injection on p-Akt<sup>473</sup> and p-STAT3 in the hypothalamus

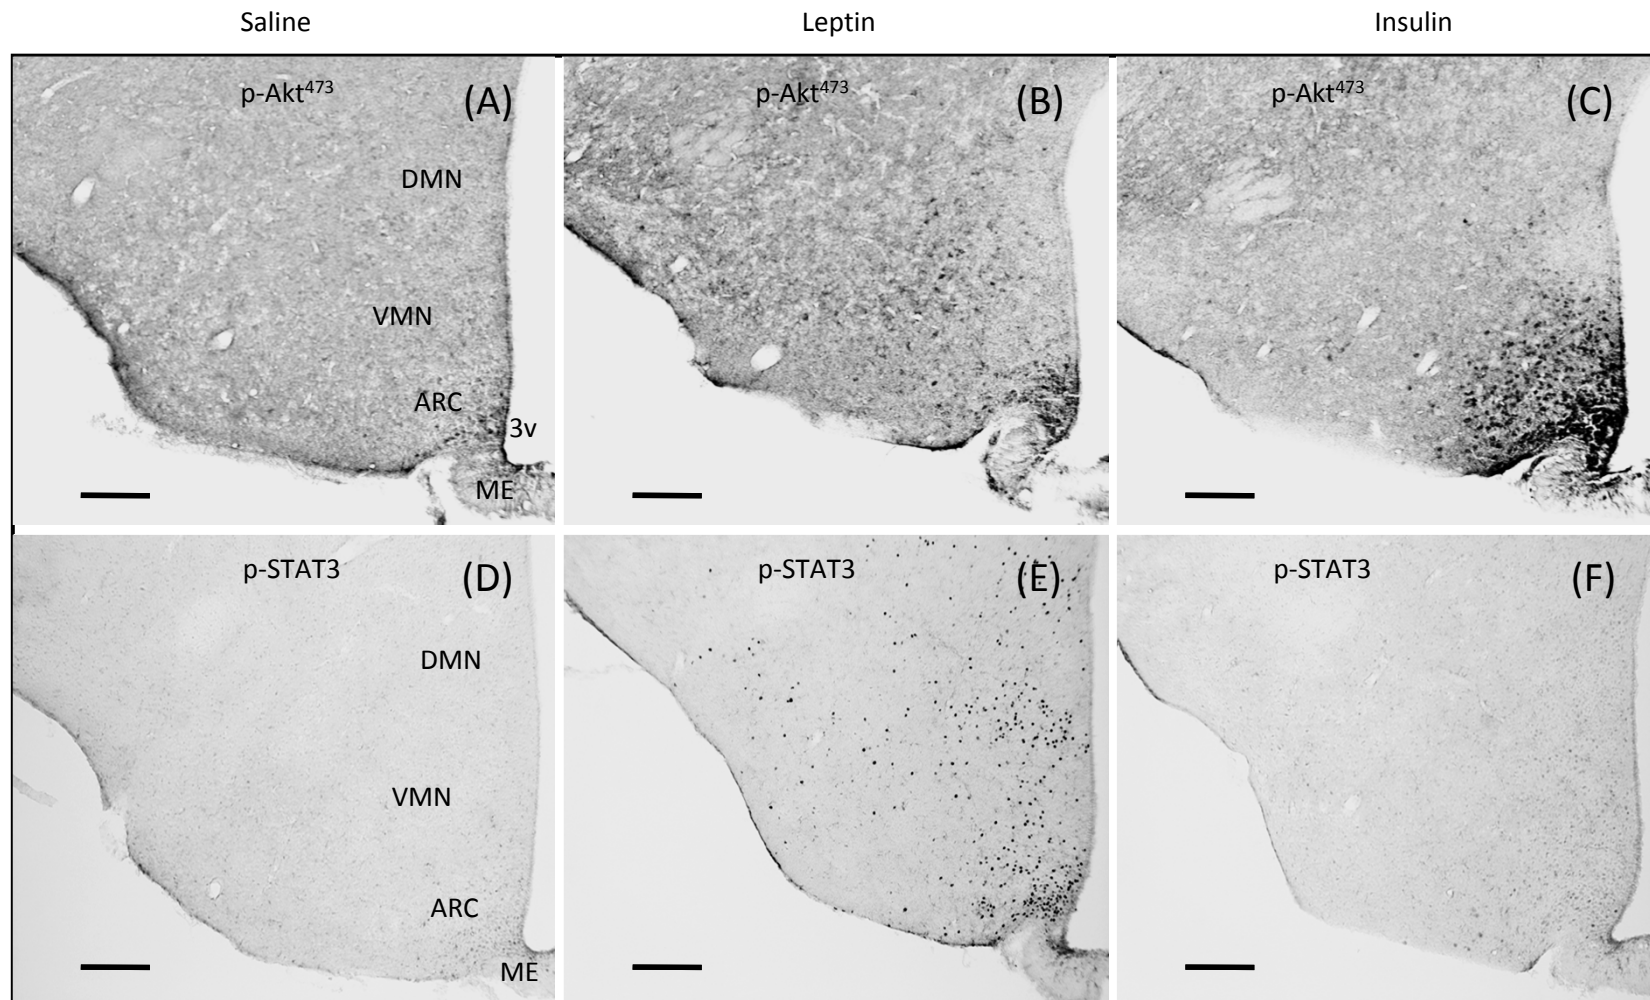

Supplementary Figure 2  
M. Sahu et al

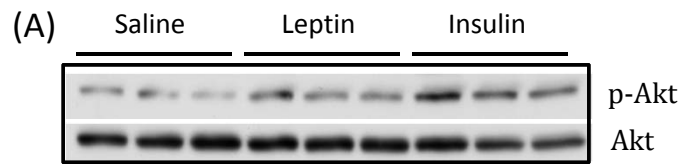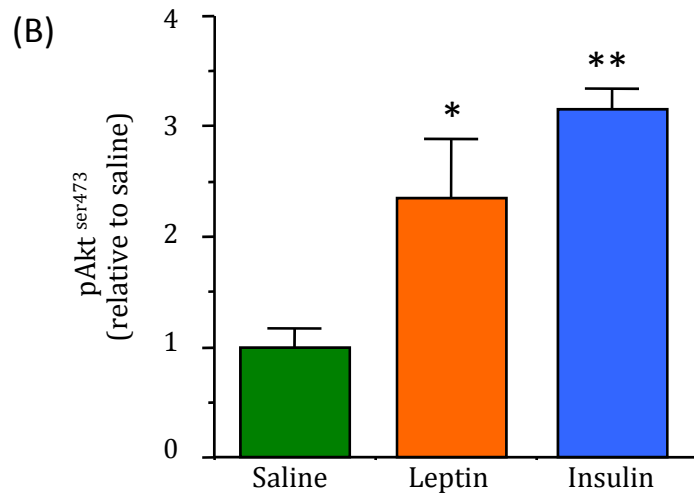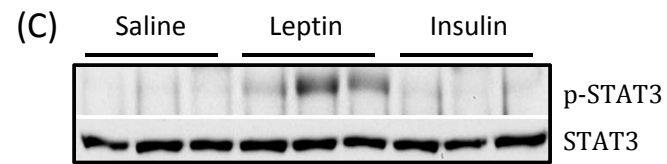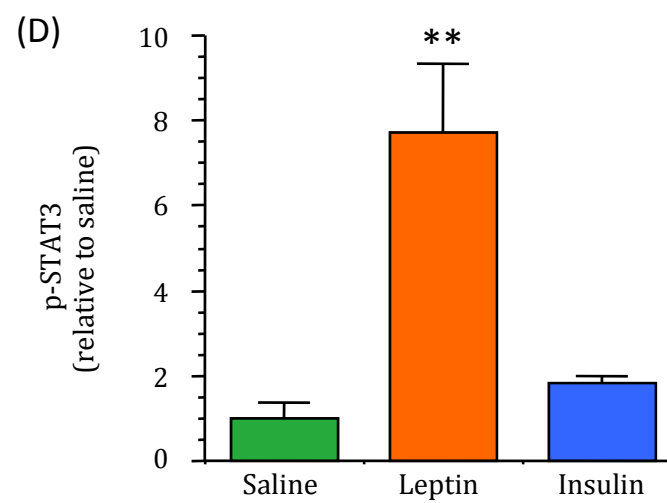

Supplementary Figure 3  
M. Sahu et al

Effect of central insulin or leptin injection on p-Akt<sup>473</sup> and p-STAT3 in the hypothalamus

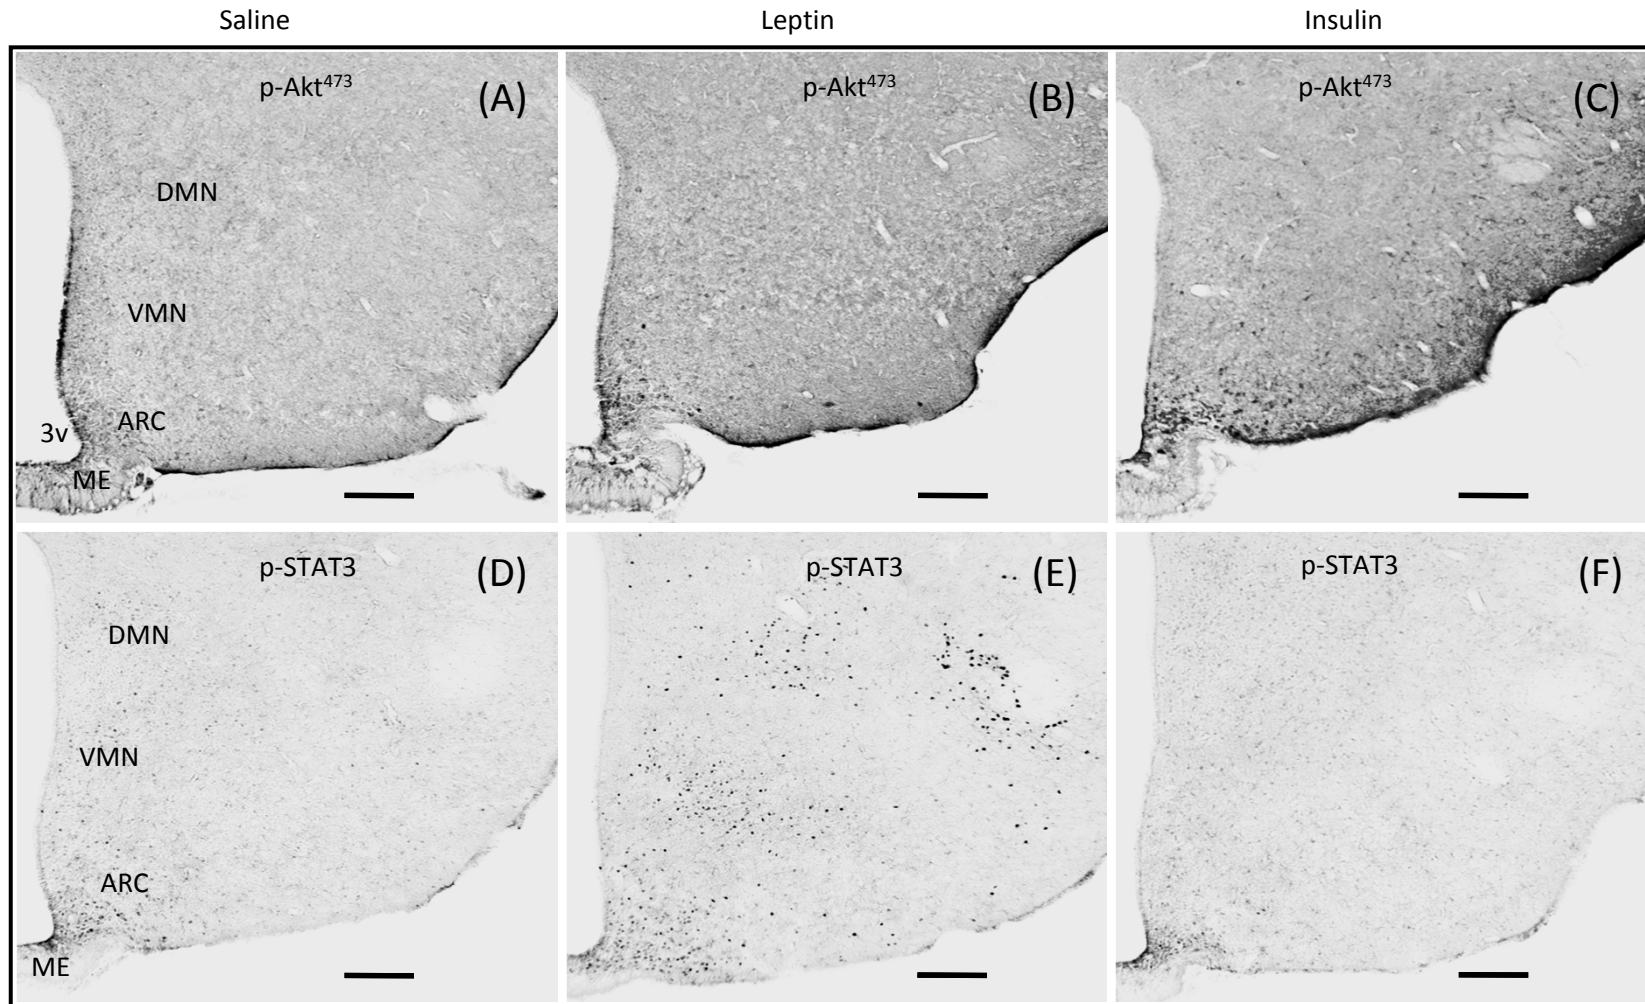

Supplementary Figure 4  
M. Sahu et al



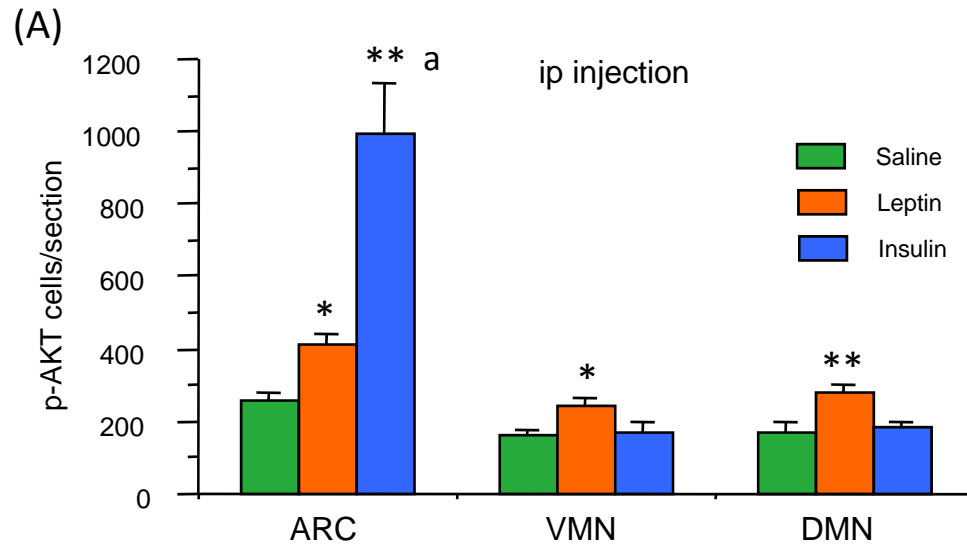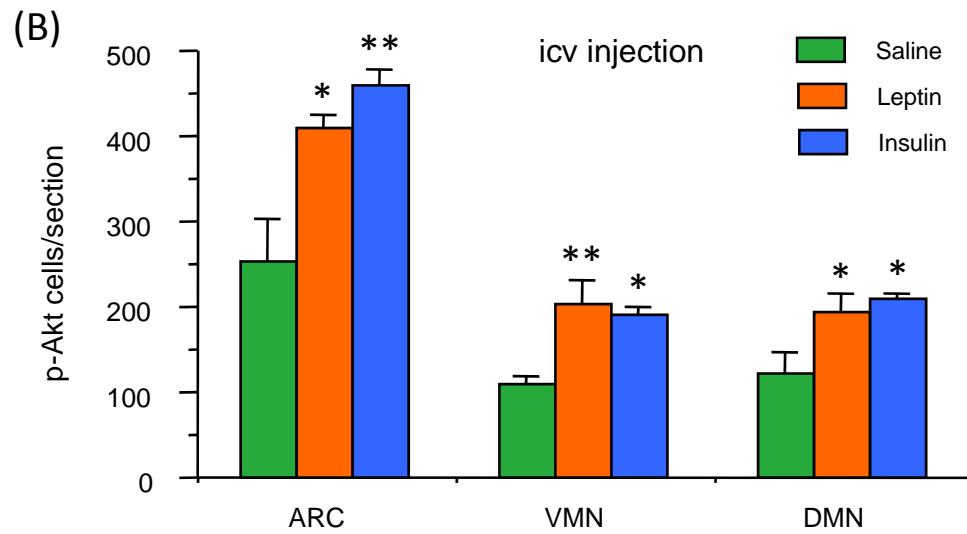

Hypothalamic nuclei

Supplementary Figure 5  
M. Sahu et al
